# Supplementary material
Source: PubMed Central journal article supplement (PMC3773099)

## Supplementary Material

Temperature-associated suicide mortality: contrasting roles of climatic warming and the suicide prevention program in Finland

Samuli Helama<sup>1</sup>, Jari Holopainen<sup>2</sup>, Timo Partonen<sup>3</sup>

<sup>1</sup>Arctic Centre, University of Lapland, Rovaniemi, Finland

<sup>2</sup>Department of Geosciences and Geography, University of Helsinki, Finland

<sup>3</sup>National Institute for Health and Welfare, Helsinki, Finland

Table S1. Descriptive statistics of data. Statistics include the sample size (n) for each data set, a measure of centre (mean), and a measure of variability (standard deviation, sd) and the ranges as maximum (max) and minimum (min) values.

| Variable/statistic     | n   | mean    | sd      | max      | min   |
|------------------------|-----|---------|---------|----------|-------|
| Suicide (overall)      | 258 | 365.721 | 455.298 | 1512.000 | 2.000 |
| Suicide (males)        | 258 | 289.620 | 357.632 | 1193.000 | 1.000 |
| Suicide (females)      | 258 | 76.101  | 98.859  | 319.000  | 0.000 |
| Temperature, °C        | 258 | 5.546   | 1.006   | 7.758    | 2.950 |
| Suicide rate (overall) | 258 | 9.380   | 9.050   | 30.249   | 0.407 |
| Suicide rate (males)   | 258 | 15.389  | 14.759  | 49.171   | 0.341 |
| Suicide rate (females) | 258 | 3.716   | 3.773   | 12.401   | 0.000 |

Table S2. Correlations between temperature and suicide rates and temperature. Pearson correlations were computed using annual values over the pre-prevention program (1751–1990) and full (1751–2008) periods. Correlations were also computed over the pre-prevention program period for the sub-periods 1751-1936 (death certificates written by a layman) and 1937-1990 (death certificates written by a doctor) (b). Statistical significance of each correlation is given in brackets.

| (a) | Period    | Overall        | Males          | Females        |
|-----|-----------|----------------|----------------|----------------|
|     | 1751-1990 | 0.178 (0.0069) | 0.169 (0.0106) | 0.147 (0.0358) |
|     | 1751-2008 | 0.025 (0.7660) | 0.020 (0.8089) | 0.011 (0.8895) |
| (b) | 1751-1936 | 0.163 (0.0205) | 0.149 (0.0350) | 0.154 (0.0401) |
|     | 1936-1990 | 0.130 (0.3807) | 0.138 (0.3535) | 0.036 (0.7780) |

Fig. S1. Comparison between the long temperature history of Uppsala and temperature record over the entire study region (70–60°N, 20–30°E) as extracted from the global dataset. The relationship was quantified using Pearson correlation ( $r$ ), determined over the common interval 1850–2008. The statistical significance ( $P$ ) of the correlation was yielded using Student's  $t$ -distribution and standard algorithms.

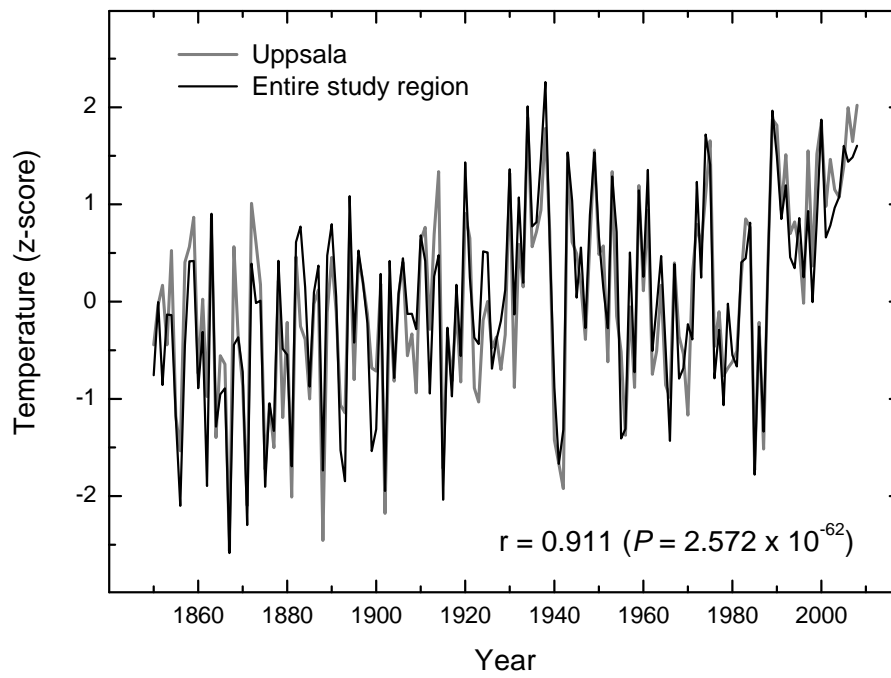

Supplement: 12199_2013_329_MOESM1_ESM.pdf [file 12199_2013_329_MOESM1_ESM.pdf]
